# Supplementary material for: A pilot study of thiamin and folic acid in hemodialysis patients with cognitive impairment
Source: PubMed Central journal article supplement (PMC8901284; doi:10.1080/0886022x.2021.1914656), 2021-04-29
Supplement: IRNF_A_1914656_SM8604.pdf [file IRNF_A_1914656_SM8604.pdf]

**Supplemental Table 5. Comparison of laboratory examination between the treatment group and the control group at 48weeks 96 weeks of follow-up**

|                                           | Treatment group     |                      | Control group       |                     |
|-------------------------------------------|---------------------|----------------------|---------------------|---------------------|
|                                           | 48 weeks(n=24)      | 96 weeks (n=22)      | 48weeks (n=21)      | 96weeks (n=16)      |
| WBC (*10 <sup>9</sup> )                   | 6.33±2.12           | 6.40±1.52            | 6.56±1.37           | 5.67±1.01           |
| Hb (g/L)                                  | 120.04±23.34        | 115.05±15.42         | 106.38±16.42        | 110.38±15.61        |
| Plt (*10 <sup>9</sup> )                   | 165.65±65.89        | 179.82±76.47         | 210.75±53.38        | 188.88±53.19        |
| ALT (U/L)                                 | 11.10±5.93          | 10.23±6.32           | 14.25±20.82         | 13.94±12.36         |
| AST (U/L)                                 | 12.68±4.06          | 11.9±6.8             | 14.38±11.66         | 13.63±8.65          |
| TP (g/L)                                  | 69.09±5.23          | 67.66±5.36           | 71.32±4.62          | 66.85±7.52          |
| TB (mmol/L)                               | 5.74±1.63           | 5.19±2.37            | 7.27±4.50           | 6.37±2.92           |
| Alb (g/L)                                 | 41.16±3.48          | 38.03±3.67           | 40.60±3.78          | 36.76±5.42          |
| PH                                        | 7.43±0.03           | 7.39±0.05            | 7.44±0.03           | 7.39±0.05           |
| HCO <sub>3</sub> <sup>-</sup><br>(mmol/L) | 26.13±1.01          | 24.3±2.99            | 25.80±1.41          | 24.15±3.04          |
| K <sup>+</sup> (mmol/L)                   | 3.13±0.53           | 3.65±0.99            | 3.34±0.61           | 3.49±0.68           |
| Na <sup>+</sup> (mmol/L)                  | 136.05±3.20         | 135.77±2.16          | 136.06±4.60         | 138.0±2.73          |
| Cl <sup>-</sup> (mmol/L)                  | 103.00±5.12         | 100.66±3.24          | 100.19±6.52         | 102.5±10.04         |
| Ca (mmol/L)                               | 2.36±0.25           | 2.37±0.28            | 2.37±0.29           | 2.34±0.30           |
| P (mmol/L)                                | 1.64±0.46           | 1.62±0.53            | 1.69±0.64           | 1.77±0.59           |
| TC (mmol/L)                               | 4.33±1.08           | 4.26±1.46            | 4.03±1.21           | 4.05±1.20           |
| TG (mmol/L)                               | 2.64±1.90           | 2.43±1.45            | 1.97±1.44           | 2.04±1.11           |
| LDL<br>(mmol/L)                           | 2.58±0.94           | 2.56±1.21            | 2.30±0.88           | 2.37±1.01           |
| HDL<br>(mmol/L)                           | 1.00±0.24           | 0.94±0.25            | 1.06±0.31           | 0.95±0.30           |
| iPTH (pg/ml)                              | 331.25±246.60       | 345.1±250.93         | 289.06±234.28       | 274.38±235.19       |
| Ferritin<br>(ng/ml)                       | 190.4(84.75,635.45) | 310.75(103.0,737.15) | 212.3(31.35,543.73) | 257.6(51.45,483.48) |

|                           |                    |                    |                   |                    |
|---------------------------|--------------------|--------------------|-------------------|--------------------|
| TSAT (%)                  | 33.39±13.90        | 30.43±12.60        | 31.54±15.37       | 29.67±14.23        |
| Glu (mmol/L)              | 7.25±2.42          | 6.07±3.04          | 7.08±3.08         | 6.14±3.07          |
| CRP (mg/dl)               | 3.12(1.15,10.33)   | 3.16(1.05,5.72)    | 7.12(1.82,17.0)   | 3.74(1.64,9.3)     |
| β <sub>2</sub> -MG (mg/L) | 7.7(6.25,12.25)    | 9.75(8.3,29.68)    | 9.0(7.85,41.48)   | 14.0(9.23,42.68)   |
| BNP(pg/ml)                | 179.0(115.0,529.0) | 237.0(120.0,431.0) | 248.5(96.0,507.0) | 383.0(94.25,910.0) |
| spKt/V                    | 1.71±0.25          | 1.73±0.25          | 1.66±0.22         | 1.60±0.19          |
