# Supplementary material for: A pilot study of thiamin and folic acid in hemodialysis patients with cognitive impairment
Source: PubMed Central journal article supplement (PMC8901284; doi:10.1080/0886022x.2021.1914656), 2021-04-29
Supplement: IRNF_A_1914656_SM8621.pdf [file IRNF_A_1914656_SM8621.pdf]

**Supplemental Table 4. Comparison of haemodialysis data between the treatment group and the control group at 48 weeks 96 weeks of follow-up**

|                                            | Treatment group    |                    | Control group      |                    |
|--------------------------------------------|--------------------|--------------------|--------------------|--------------------|
|                                            | 48 weeks<br>(n=24) | 96 weeks<br>(n=22) | 48 weeks<br>(n=21) | 96 weeks<br>(n=16) |
| Dialysis duration (h/ session)             | 4.04±0.20          | 4.00±0.00          | 4.00±0.00          | 4.00±0.00          |
| Dialysis frequencies (time/week)           | 2.96±0.20          | 3.0±0.00           | 2.95±0.22          | 2.94±0.25          |
| Dialysis modality (HD, %)                  | 12 (50)            | 11 (50)            | 11 (52.4)          | 8 (50)             |
| Vascular access (fistula, %)               | 24 (100)           | 22 (100)           | 21 (100)           | 16 (100)           |
| Average ultrafiltration (L/session)        | 2.50±0.77          | 2.66±0.66          | 2.23±0.57          | 2.41±0.88          |
| Intradialytic hypotension<br>(patients, %) | 12 (50)            | 10 (45.5)          | 10 (47.6)          | 7 (43.8)           |
| Low molecular heparin (%)                  | 9 (37.5)           | 22 (100)           | 7 (33.3)           | 16 (100)           |
| Pre-dialysis weight, kg                    | 64.44±9.96         | 62.22±10.41        | 61.04±7.98         | 61.54±9.81         |
| Post-dialysis weight, kg                   | 62.41±9.56         | 59.94±10.21        | 58.99±7.74         | 59.36±9.43         |
| Pre-dialysis systolic pressure,<br>mmHg    | 148.13±25.96       | 137.5±26.9         | 141.2±23.0<br>2    | 146.94±26.<br>74   |
| Post-dialysis systolic pressure,<br>mmHg   | 135.63±21.59       | 132.23±24.1<br>8   | 144.50±33.<br>95   | 129.19±22.<br>81   |

---

|                                        |             |             |                 |                 |
|----------------------------------------|-------------|-------------|-----------------|-----------------|
| Pre-dialysis diastolic pressure, mmHg  | 69.33±13.42 | 67.82±9.56  | 71.80±12.5<br>8 | 70.75±13.1<br>3 |
| Post-dialysis diastolic pressure, mmHg | 69.25±12.26 | 67.55±10.59 | 71.90±17.7<br>3 | 64.75±14.9<br>3 |
| Pre-dialysis heart rate, BPM           | 77.96±9.20  | 76.05±9.65  | 74.15±10.5<br>7 | 74.63±12.1<br>4 |
| Post-dialysis heart rate, BPM          | 78.33±12.56 | 73.64±11.76 | 75.15±11.08     | 75.31±9.0       |

---
