# Supplementary material for: A pilot study of thiamin and folic acid in hemodialysis patients with cognitive impairment
Source: PubMed Central journal article supplement (PMC8901284; doi:10.1080/0886022x.2021.1914656), 2021-04-29
Supplement: IRNF_A_1914656_SM8623.pdf [file IRNF_A_1914656_SM8623.pdf]

**Supplemental Table 3. Comparison of seven items of MoCA score at baseline and the 96 weeks of follow-up in the treatment group.**

| Items of MoCA (score)     | T0(n=22)  | T4(n=22)  | p-value | Alpha after Bonferroni adjustment |
|---------------------------|-----------|-----------|---------|-----------------------------------|
| Visuospatial/executive(5) | 4.09±1.02 | 4.27±0.88 | 0.296   | 0.007                             |
| Naming(3)                 | 2.82±0.40 | 2.73±0.46 | 0.162   | 0.007                             |
| Attention(6)              | 4.27±1.08 | 4.64±0.85 | 0.073   | 0.007                             |
| Language(3)               | 1.86±0.56 | 2.09±0.68 | 0.135   | 0.007                             |
| Abstraction(2)            | 1.23±0.81 | 1.50±0.67 | 0.030   | 0.007                             |
| Delayed recall(5)         | 1.82±1.18 | 4.41±0.80 | 0.000*  | 0.007                             |
| Orientation(6)            | 5.95±0.21 | 5.95±0.21 | 1.000   | 0.007                             |

\*Bonferroni adjustment of the items of the MoCA shows delayed recall was improved by thiamine and folic acid treatment significantly
