# Supplementary material for: A pilot study of thiamin and folic acid in hemodialysis patients with cognitive impairment
Source: PubMed Central journal article supplement (PMC8901284; doi:10.1080/0886022x.2021.1914656), 2021-04-29
Supplement: IRNF_A_1914656_SM8631.pdf [file IRNF_A_1914656_SM8631.pdf]

**Supplemental Table 2. Comparison of the proportion of patients with MoCA scores  $\geq 26$  points at 48 and 96 weeks of follow-up between the treatment group and the control group**

|                       | Treatment group |                | Control group  |                |
|-----------------------|-----------------|----------------|----------------|----------------|
|                       | 48weeks (n=22)  | 96weeks (n=22) | 48weeks (n=16) | 96weeks (n=16) |
| MoCA $\geq 26$<br>(%) | 11 (50.0) *     | 16 (72.7) #    | 1 (6.2)        | 1 (6.2)        |
| MoCA $< 26$<br>(%)    | 11 (50.0)       | 6 (27.3)       | 15 (93.8)      | 15 (93.8)      |

\*48 weeks of follow-up in treatment group vs 48 weeks of follow-up in control group,  $p=0.012$

#96 weeks of follow-up in treatment group vs 96 weeks of follow-up in control group,  $p<0.001$
