# Supplementary material for: A pilot study of thiamin and folic acid in hemodialysis patients with cognitive impairment
Source: PubMed Central journal article supplement (PMC8901284; doi:10.1080/0886022x.2021.1914656), 2021-04-29
Supplement: IRNF_A_1914656_SM8632.pdf [file IRNF_A_1914656_SM8632.pdf]

**Supplemental Table 1. Comparison of baseline data between the treatment group and the control group**

|                                        | Treatment group<br>(n=25) | Control group<br>(n=25)   | p value |
|----------------------------------------|---------------------------|---------------------------|---------|
| Height, cm                             | 166.36±7.31               | 166.52±6.61               | 0.936   |
| Income (≥30,000 Yuan, n [%])           | 18 (72)                   | 22 (88)                   | 0.157   |
| Medical costs (10,000 Yuan/year)       | 0.93±0.83                 | 0.70±0.44                 | 0.265   |
| Working status, n (%)                  | 25 (100)                  | 24 (96)                   | 1.000   |
| Active vitamin D therapy, n (%)        | 12 (48)                   | 10 (40)                   | 0.569   |
| Intravenous iron therapy, n (%)        | 8 (32)                    | 8 (32)                    | 1.000   |
| Dialysis modality (HD, %)              | 19 (76)                   | 19 (76)                   | 1.000   |
| Vascular access (fistula, %)           | 25 (100)                  | 25 (100)                  | 1.000   |
| Average ultrafiltration (L/session)    | 2.68±0.91                 | 2.25±0.46                 | 0.039   |
| Low molecular heparin (%)              | 11 (44)                   | 11 (44)                   | 1.000   |
| Pre-dialysis weight, kg                | 66.31±10.06               | 61.98±8.70                | 0.110   |
| Post-dialysis weight, kg               | 64.19±9.65                | 59.77±8.84                | 0.097   |
| Pre-dialysis systolic pressure, mmHg   | 143.64±30.88              | 140.48±23.37              | 0.685   |
| Post-dialysis systolic pressure, mmHg  | 139.84±24.80              | 135.16±23.67              | 0.498   |
| Pre-dialysis diastolic pressure, mmHg  | 71.16±10.79               | 69.36±13.20               | 0.600   |
| Post-dialysis diastolic pressure, mmHg | 74.80±12.49               | 68.88±12.75               | 0.104   |
| Pre-dialysis heart rate, BPM           | 77.44±8.58                | 77.36±10.83               | 0.977   |
| Post-dialysis heart rate, BPM          | 78.80±10.46               | 74.36±12.37               | 0.177   |
| WBC (*10 <sup>9</sup> )                | 7.14±2.40                 | 7.12±1.49                 | 0.983   |
| Plt (*10 <sup>9</sup> )                | 185.00±71.50              | 206.00±62.29              | 0.296   |
| TB (mmol/L)                            | 5.60±1.77                 | 6.06±2.63                 | 0.489   |
| Cl <sup>-</sup> (mmol/L)               | 103.71±5.65               | 102.82±4.52               | 0.561   |
| LDL (mmol/L)                           | 2.54±0.94                 | 2.28±0.90                 | 0.339   |
| HDL (mmol/L)                           | 0.91±0.25                 | 0.95±0.20                 | 0.535   |
| Ferritin (ng/ml)                       | 108.20<br>(40.68,323.42)  | 227.50<br>(122.35,649.88) | 0.016   |
| TSAT (%)                               | 24.81±10.22               | 37.74±18.72               | 0.007   |
| TSH (mIU/L)                            | 1.58±1.31                 | 1.48±0.74                 | 0.753   |
